# Supplementary material for: Potential Effects of Antioxidant and Serum Cholesterol‐Lowering Effects of Gynura bicolor Water Extracts in Syrian Hamster
Source: Hindawi journal article supplement (doi:10.1155/2020/2907610), 2020-01-01
Supplement: f1 [file 2907610.f1.zip]

Archive with 2 entries (2 files):
- 2907610.f1/20200510 supplementary  figure 1_ECAM_3081860.docx
- 2907610.f1/20200510 Supplementary Table 1_ECAM_3081859.docx
