# Supplementary material for: Potential Effects of Antioxidant and Serum Cholesterol‐Lowering Effects of Gynura bicolor Water Extracts in Syrian Hamster
Source: Hindawi journal article supplement (doi:10.1155/2020/2907610), 2020-01-01
Supplement: f1 [file 2907610.f1.zip › 2907610.f1/20200510 supplementary figure 1_ECAM_3081860.docx]

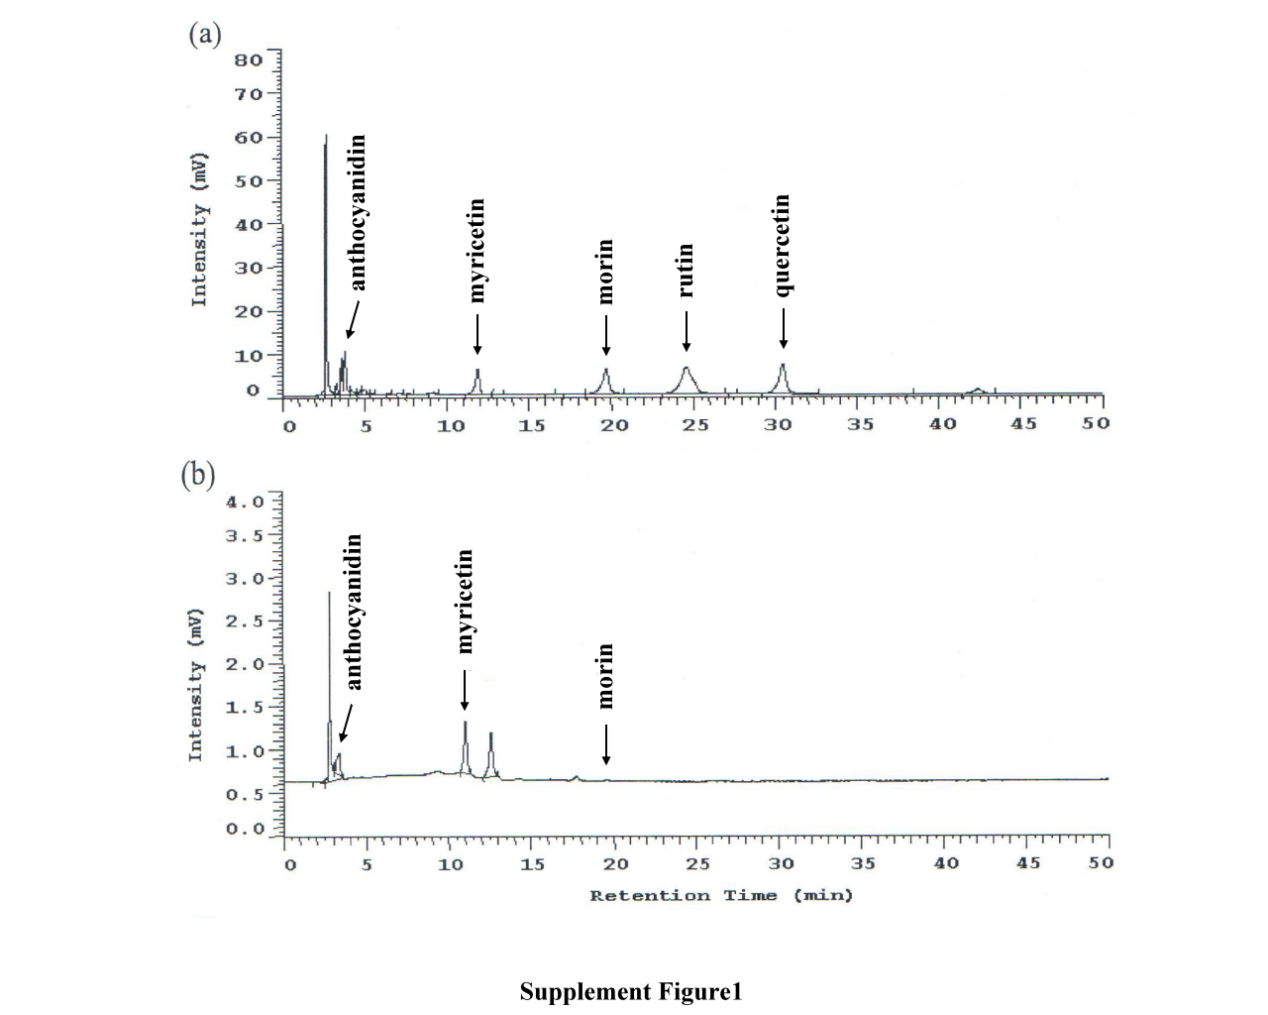


# Supplementary Figure 1 High-performance liquid chromatography chromatograms of (A) the anthocyanidin, myricetin, morin, rutin and quercetin standards and (B) the GBWE.
