# Supplementary material for: Potential Effects of Antioxidant and Serum Cholesterol‐Lowering Effects of Gynura bicolor Water Extracts in Syrian Hamster
Source: Hindawi journal article supplement (doi:10.1155/2020/2907610), 2020-01-01
Supplement: f1 [file 2907610.f1.zip › 2907610.f1/20200510 Supplementary Table 1_ECAM_3081859.docx]

Supplementary Table 1. Effects of the *Gynura bicolor* water extract (GBWE) on the growth characteristics of Syrian hamsters fed a normal diet, a high-fat diet (HFD) or a high-fat diet combined with the GBWE for 12 weeks.

| Group1 | Final body weight (g) | Body weight gain (g) | Dietary food intake (g/day) | FER  (%) |
| --- | --- | --- | --- | --- |
| ND | 109.5±4.7 | 50.8±6.5 | 5.14±0.61 | 0.14±0.02 a |
| HFD | 115.2±9.8 | 53.6±9.0 | 4.90±0.35 | 0.08±0.01 a |
| Probucol | 103.4±4.1 | 45.0±3.3 | 5.02±0.31 | 0.11±0.04 b |
| GBWE-L | 110.8±1.5 | 48.0±1.2 | 5.08±0.26 | 0.12±0.03 b |
| GBWE-H | 108.5±9.8 | 51.4±9.3 | 5.00±0.37 | 0.11±0.02 b |

1 ND: normal diet; HFD: high-fat diet; Probucol: probucol and the HFD; GBWE-L: 0.4 g GBWE/kg BW and the HFD; GBWE-H: 0.8 g GBWE/kg BW and the HFD; FER: food efficiency ratio.

2 The data are presented as the means ± SDs. Groups with different letters (a and b) are significantly different, as demonstrated by Duncan’s test (p<0.05)
